# Supplementary material for: Exploring the Cumulative Selectivity of Polycyclic Aromatic Hydrocarbons in Phytoplankton, Water, and Sediment in Typical Urban Water Bodies
Source: MDPI journal article supplement (doi:10.3390/w14193145), 2022-10-06
Supplement: s1 [file s1]

Archive with 1 entries (1 files):
- water-1900605-supplementary.pdf
